# Supplementary material for: Reproducibility of Fluorescent Expression from Engineered Biological Constructs in E. coli
Source: PubMed Central journal article supplement (PMC4777433; doi:10.1371/journal.pone.0150182), 2016-03-03

# S11 Additional Rank-Sorted Data Graphs

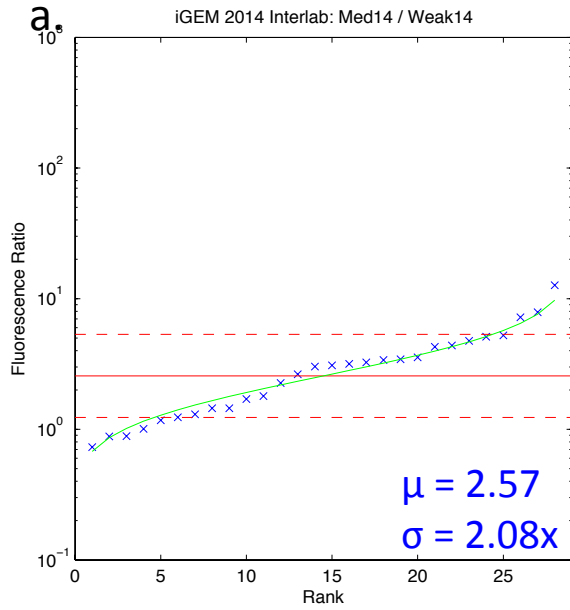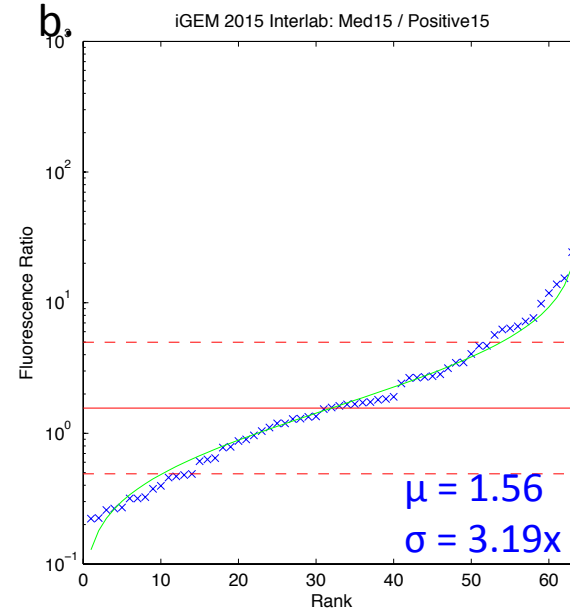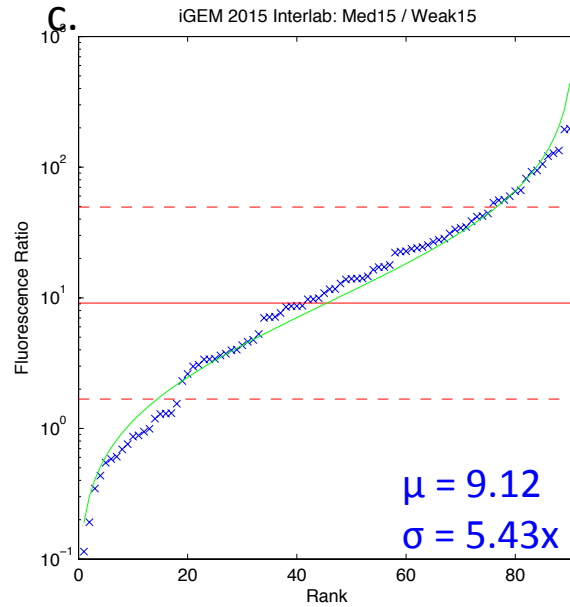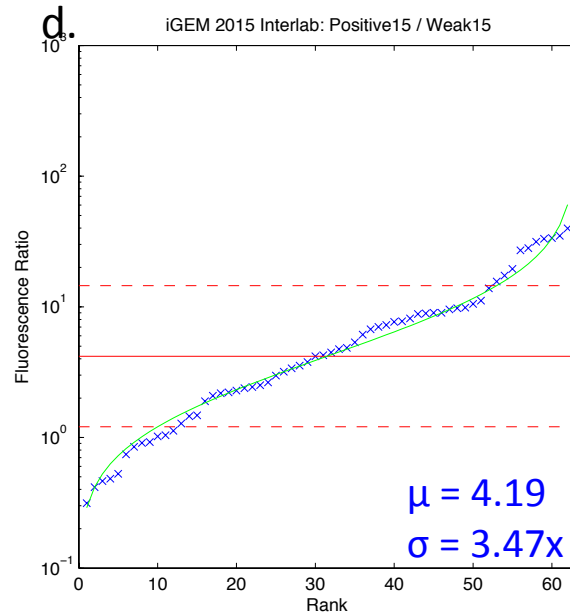

Supplement: pone.0150182.s011.pdf [file pone.0150182.s011.pdf]
